# Supplementary material for: Sensitive and rapid detection of Ortleppascaris sinensis (Nematoda: Ascaridoidea) by loop-mediated isothermal amplification
Source: PeerJ. 2019 Sep 6;7:e7607. doi: 10.7717/peerj.7607 (PMC6733237; doi:10.7717/peerj.7607)
Supplement: Supplemental Information 3 — Turbidity was monitored by a Loopamp real-time turbidimeter at 400 nm every 6 s, the curve graph was analyzed every 1 min. [file peerj-07-7607-s003.xlsx]

## Sheet: Specificity
Channel:	A1	A2	A3	A4	A5	A6	A7	A8	B1	B2	B3
File Comment:
Comment:
Bonnet Temp:	75	75	75	75	75	75	75	75	75	75	75
Block Temp:	65	65	65	65	65	65	65	65	65	65	65
Threshold:	0.1	0.1	0.1	0.1	0.1	0.1	0.1	0.1	0.1	0.1	0.1
Number of Filters:	20	20	20	20	20	20	20	20	20	20	20
Filter Interval:	25	25	25	25	25	25	25	25	25	25	25
Ignore Time(Bef.):	10	10	10	10	10	10	10	10	10	10	10
Ignore Time(Aft.):	60	60	60	60	60	60	60	60	60	60	60
Adjustment Mode:	slope	slope	slope	slope	slope	slope	slope	slope	slope	slope	slope
Number of Data:	5	5	5	5	5	5	5	5	5	5	5
Adjustment Time1:	8	8	8	8	8	8	8	8	8	8	8
Adjustment Time2:	10	10	10	10	10	10	10	10	10	10	10
Condition Name:	D(No Setting)	D(No Setting)	D(No Setting)	D(No Setting)	D(No Setting)	D(No Setting)	D(No Setting)	D(No Setting)	D(No Setting)	D(No Setting)	D(No Setting)
Tt:	1368	0	0	0	0	0	0	0	0	0	0
Time	Os	AL	AN	TSP	CE	TS	TA	LI	FG	SJ	NC
0	0	0	0	0	0	0	0	0	0	0	0
60	0	0	0	0	0	0	0	0	0	0	0
120	0	0	0	0	0	0	0	0	0	0	0
180	0	0	0	0	0	0	0	0	0	0	0
240	0	0	0	0	0	0	0	0	0	0	0
300	0	0	0	0	0	0	0	0	0	0	0
360	0	0	0	0	0	0	0	0	0	0	0
420	0	0	0	0	0	0	0	0	0	0	0
480	0	0	0	0	0	0	0	0	0	0	0
540	0	0	0	0	0	0	0	0	0	0	0
600	0	0	0	0	0	0	0	0	0	0	0
660	0.0004	-0.0004	0.0001	-0.0005	-0.0003	0	0.0001	0.0001	-0.0003	0	0.0001
720	0.0002	-0.0004	-0.0002	-0.0005	-0.0003	0	0.0003	0.0001	-0.0002	-0.0003	-0.0001
780	-0.0001	0.0001	0.0004	-0.0006	-0.0003	0	0.0004	-0.0004	-0.0001	-0.001	0
840	0.0001	0.0002	-0.0004	-0.0006	-0.0003	0.0001	0.0005	-0.0003	0.0004	-0.0014	0.0006
900	0.0003	-0.0002	0.0002	-0.0001	-0.0007	-0.0008	0.0006	0.0002	0.0003	-0.001	0.0003
960	0.0005	-0.0002	0.0003	-0.0006	-0.0003	-0.0003	0.0008	-0.0002	0.0001	-0.0012	0
1020	0.0007	-0.0001	0.0004	-0.0006	-0.0003	0.0002	0.0009	-0.0002	0.0002	-0.0016	0.001
1080	0.0009	0.0004	0.0006	-0.0006	-0.0007	-0.0007	0.001	-0.0002	0.0003	-0.0011	0.0007
1140	0.0016	0	0.0011	-0.0006	-0.0007	0.0003	0.0011	-0.0002	0.0007	-0.0018	0.0005
1200	0.0027	0.0005	0.0004	-0.0001	-0.0003	-0.0001	0.0013	-0.0001	0.0009	-0.0012	0.001
1260	0.0306	-0.0004	0.0005	-0.0006	0.0002	-0.0001	0.0009	-0.0001	0.0009	-0.0012	0.0011
1320	0.1144	0.0001	0.0011	-0.0006	-0.0007	0.0004	0.0015	-0.0001	0.0006	-0.0007	0.0009
1380	0.21	0.0006	0.0012	-0.0011	-0.0007	0.0004	0.0016	-0.0005	0.0006	-0.0006	0.001
1440	0.2599	0.0002	0.0009	-0.0006	-0.0002	0.0005	0.0013	0	0.0012	-0.0001	0.0012
1500	0.2902	0.0002	0.0014	-0.0006	-0.0007	0.0005	0.0019	-0.0004	0.0013	0.0012	0.0013
1560	0.3127	-0.0002	0.0011	-0.0002	-0.0002	0.0006	0.0015	0.0001	0.0009	0.0017	0.0018
1620	0.333	-0.0001	0.0017	-0.0006	-0.0007	0.0006	0.0021	0.0001	0.001	0.0027	0.002
1680	0.3487	0.0004	0.0018	-0.0002	-0.0007	0.0007	0.0022	-0.0003	0.0011	0.0036	0.0021
1740	0.3651	0.0009	0.0019	-0.0007	-0.0007	0.0007	0.0024	-0.0003	0.0015	0.0041	0.0019
1800	0.3808	0	0.0016	-0.0006	-0.0007	-0.0002	0.002	0.0002	0.0016	0.0046	0.002
1860	0.3941	0.0005	0.0022	-0.0002	-0.0002	0.0008	0.0026	0.0002	0.0017	0.0055	0.0026
1920	0.408	0.0005	0.0023	-0.0007	-0.0002	0.0008	0.0027	0.0003	0.0017	0.0064	0.0027
1980	0.4207	0.001	0.002	-0.0007	-0.0007	0.0004	0.0029	0.0003	0.0014	0.0069	0.0028
2040	0.4348	0.0006	0.0026	-0.0007	-0.0007	0.0009	0.0034	0.0003	0.0019	0.0075	0.0026
2100	0.4453	0.0007	0.0027	0.0002	-0.0002	0.0009	0.0031	0.0004	0.0016	0.008	0.0027
2160	0.4582	0.0007	0.0028	-0.0003	-0.0002	0.0005	0.0032	0.0004	0.002	0.0093	0.0029
2220	0.4707	0.0008	0.0025	-0.0007	-0.0002	0.001	0.0034	0.0004	0.0022	0.0098	0.003
2280	0.4807	0.0013	0.0026	-0.0007	-0.0002	0.0011	0.0035	0.0005	0.0022	0.0103	0.0036
2340	0.488	0.0013	0.0032	-0.0003	-0.0002	0.0011	0.0036	0.0001	0.0024	0.0113	0.0033
2400	0.4928	0.0018	0.0029	-0.0003	-0.0002	0.0012	0.0042	0.0009	0.0023	0.0117	0.0034
2460	0.4947	0.0014	0.003	-0.0007	-0.0002	0.0007	0.0043	0.0006	0.0025	0.0127	0.0032
2520	0.4933	0.0014	0.0036	-0.0007	-0.0002	0.0013	0.0045	0.0006	0.0026	0.014	0.0038
2580	0.4895	0.001	0.0033	-0.0007	-0.0002	0.0008	0.0041	0.0002	0.0026	0.0145	0.0039
2640	0.4822	0.0015	0.0034	-0.0003	-0.0007	0.0013	0.0047	0.0011	0.0032	0.0155	0.004
2700	0.4722	0.0016	0.0035	-0.0003	-0.0006	0.0014	0.0043	0.0007	0.0027	0.0156	0.0038
2760	0.4616	0.0016	0.0036	-0.0003	-0.0002	0.001	0.0049	0.0007	0.0033	0.0169	0.0043
2820	0.4516	0.0017	0.0046	-0.0007	-0.0002	0.0015	0.0051	0.0008	0.0034	0.0174	0.0045
2880	0.4397	0.0017	0.0043	-0.0003	-0.0007	0.0015	0.0052	0.0004	0.0029	0.0175	0.005
2940	0.427	0.0022	0.0044	-0.0004	-0.0006	0.0015	0.0048	0.0008	0.0031	0.0188	0.0051
3000	0.417	0.0014	0.0046	-0.0008	-0.0011	0.0016	0.0055	0.0009	0.0036	0.0198	0.0053
