# Supplementary material for: Sensitive and rapid detection of Ortleppascaris sinensis (Nematoda: Ascaridoidea) by loop-mediated isothermal amplification
Source: PeerJ. 2019 Sep 6;7:e7607. doi: 10.7717/peerj.7607 (PMC6733237; doi:10.7717/peerj.7607)
Supplement: Supplemental Information 4 — Turbidity was monitored by a Loopamp real time turbidimeter at 400 nm every 6 s, the curve graph was analyzed every 1 min. [file peerj-07-7607-s004.xlsx]

## Sheet: Sensitivity
Channel:	A1	A2	A3	A4	A5	A6	A7
File Comment:
Comment:
Bonnet Temp:	73	73	73	73	73	73	73
Block Temp:	63	63	63	63	63	63	63
Threshold:	0.1	0.1	0.1	0.1	0.1	0.1	0.1
Number of Filters:	20	20	20	20	20	20	20
Filter Interval:	25	25	25	25	25	25	25
Ignore Time(Bef.):	10	10	10	10	10	10	10
Ignore Time(Aft.):	60	60	60	60	60	60	60
Adjustment Mode:	slope	slope	slope	slope	slope	slope	slope
Number of Data:	5	5	5	5	5	5	5
Adjustment Time1:	8	8	8	8	8	8	8
Adjustment Time2:	10	10	10	10	10	10	10
Condition Name:	D(No Setting)	D(No Setting)	D(No Setting)	D(No Setting)	D(No Setting)	D(No Setting)	D(No Setting)
Tt:	1194	1260	1428	1578	2148	0	0
Time	34.60 ng/µl	3.46 ng/µl	0.346 ng/µl	34.60 pg/µl	3.46 pg/µl	0.346 pg/µl	NC
0	0	0	0	0	0	0	0
60	0	0	0	0	0	0	0
120	0	0	0	0	0	0	0
180	0	0	0	0	0	0	0
240	0	0	0	0	0	0	0
300	0	0	0	0	0	0	0
360	0	0	0	0	0	0	0
420	0	0	0	0	0	0	0
480	0	0	0	0	0	0	0
540	0	0	0	0	0	0	0
600	0	0	0	0	0	0	0
660	0	0	0.0004	0.0005	-0.0005	0	0.0002
720	0.0001	0.0001	0.0001	0.0006	0	0	0.0003
780	0.0001	-0.0003	0.0001	0.0008	0.0001	0	-0.0001
840	0.0002	0.0002	0.0003	0.0004	0.0001	-0.0004	0.0005
900	0.0002	0.0008	0.0003	0.0006	0.0001	0	0.0005
960	-0.0002	0.0004	0.0004	0.0003	0.0002	0	0.0002
1020	0.0007	0.0005	0	0.0009	-0.0002	-0.0006	0.0007
1080	0.0216	0.0006	0.0006	0.0009	-0.0002	-0.0004	0.0009
1140	0.1043	0.0138	0.0007	0.0015	-0.0001	-0.0001	0.0004
1200	0.1953	0.0948	0.0003	0.0016	-0.0001	-0.0001	0.001
1260	0.267	0.1908	0.0013	0.0018	0	-0.0005	0.0011
1320	0.3126	0.265	0.0324	0.0015	0.0004	0	0.0007
1380	0.343	0.3124	0.1132	0.002	0	-0.0005	0.0013
1440	0.3689	0.3439	0.2005	0.0154	0.0001	-0.0005	0.001
1500	0.3933	0.3698	0.2694	0.0759	0.0006	-0.0006	0.001
1560	0.4148	0.3923	0.3154	0.1571	0.0001	0	0.0016
1620	0.4331	0.4131	0.3454	0.2372	0.0007	-0.0006	0.0012
1680	0.4501	0.4326	0.3715	0.291	0.0007	0	0.0018
1740	0.4675	0.4518	0.3926	0.3285	0.0008	-0.0007	0.0014
1800	0.4838	0.4688	0.4111	0.3534	0.0012	-0.0005	0.002
1860	0.5023	0.4844	0.4268	0.3747	0.0061	-0.0001	0.0016
1920	0.5164	0.4989	0.4449	0.393	0.0199	-0.0001	0.0022
1980	0.5312	0.5138	0.459	0.4075	0.0494	-0.0002	0.0017
2040	0.5454	0.5288	0.4758	0.4213	0.0874	-0.0005	0.0023
2100	0.5543	0.5385	0.4899	0.4331	0.138	-0.0001	0.0024
2160	0.5561	0.5484	0.5012	0.446	0.189	-0.0007	0.002
2220	0.5561	0.5513	0.5136	0.4559	0.2275	-0.0006	0.0022
2280	0.5456	0.5526	0.5247	0.4672	0.2661	-0.0007	0.0027
2340	0.5344	0.5515	0.5303	0.4778	0.2924	-0.0006	0.0028
2400	0.5246	0.5401	0.536	0.4891	0.3171	-0.0008	0.0024
2460	0.5079	0.5291	0.5401	0.4943	0.3336	-0.0002	0.003
2520	0.4907	0.5149	0.5389	0.5016	0.348	-0.0006	0.0031
2580	0.4775	0.5003	0.5339	0.5048	0.3608	-0.0002	0.0027
2640	0.4654	0.4823	0.5272	0.5075	0.37	-0.0006	0.0033
2700	0.4539	0.4719	0.5186	0.5102	0.3801	-0.0002	0.0029
2760	0.4437	0.4586	0.5098	0.5087	0.3864	-0.0003	0.003
2820	0.4324	0.4456	0.4966	0.5058	0.3957	-0.0006	0.0031
2880	0.4259	0.4352	0.4869	0.5064	0.4035	-0.0003	0.0032
2940	0.4151	0.4248	0.4745	0.5046	0.4103	-0.0007	0.0037
3000	0.4093	0.4177	0.4631	0.4989	0.4195	-0.0007	0.0034
